# Supplementary material for: Redox-controlled δ-Dawson {Mn2IIIW17} polyoxometalate with photocatalytic H2 evolution activity
Source: Royal Society of Chemistry journal article supplement (doi:10.1039/c3cc47703g), 2013-12-12
Supplement: c3cc47703g1.pdf [file c3cc47703g1.pdf]

## Supplementary Information

### **Redox-controlled $\delta$ -Dawson $\{\text{Mn}^{\text{III}}_2\text{W}_{17}\}$ polyoxometalate with photocatalytic $\text{H}_2$ evolution activity**

Yan-Qing Jiao, Chao Qin, Xin-Long Wang\*, Fu-Hong Liu, Peng Huang, Chun-Gang Wang, Kui-Zhan Shao and Zhong-Min Su\*

*Institute of Functional Material Chemistry, Key Lab of Polyoxometalate Science of Ministry of Education, Faculty of Chemistry, Northeast Normal University, Changchun 130024, P. R. China.  
Fax: +86-431-85684009; Tel: +86-431-85099108. E-mail: zmsu@nenu.edu.cn.*

#### **1. Materials and Measurements**

All the chemicals were obtained from commercial sources, and were used without further purification. Elemental analyses (C, N, and H) were measured on a Perkin-Elmer 2400 CHN elemental analyzer; Mn and W were determined with a Plasma-SPEC(I) ICP atomic emission spectrometer. UV/Vis absorption spectra were obtained by using a 752 PC UV/Vis spectrophotometer. Diffuse reflectivity was measured from 200 to 800 nm using barium sulfate ( $\text{BaSO}_4$ ) as a standard with 100% reflectance on a Varian Cary 500 UV-Vis spectrophotometer. Single-crystal X-ray diffraction data were recorded on a Bruker Apex CCD II area-detector diffractometer with graphite-monochromated Mo-K $\alpha$  radiation ( $\lambda = 0.71069 \text{ \AA}$ ) at 298(2) K. Absorption corrections were applied using multiscan technique and performed by using the SADABS program. The structure was solved by direct methods and refined on  $F^2$  by full-matrix leastsquares methods by using the SHELXTL package. Powder X-ray diffraction measurement was recorded radiation ranging from  $5^\circ$  to  $50^\circ$  at room temperature on a Siemens D5005 diffractometer with Cu-K $\alpha$  ( $\lambda = 1.5418 \text{ \AA}$ ). Thermogravimetric analysis (TGA) of the samples was performed using a Perkin-Elmer TG-7 analyzer heated from room temperature to  $600 \text{ }^\circ\text{C}$  under nitrogen at the heating rate of  $10 \text{ }^\circ\text{C}\cdot\text{min}^{-1}$ . X-ray photoelectron spectroscopy analyses were performed on a VG ESCALABMKII spectrometer with an Al-K $\alpha$  (1486.6 eV) achromatic X-ray source. The vacuum inside the analysis chamber was maintained at  $6.2 \times 10^{-6} \text{ Pa}$  during the analysis. Magnetic susceptibilities were measured on finely grounded single crystal samples (grease restricted) with the use of a Quantum Design SQUID magnetometer MPMS-XL. Dynamic light scattering (DLS): DLS measurements were done by using a Zetasizer NanoZS (Malvern Instruments). Contact angles were measured on a KRÜSS DSA20MK2 Drop Shape Analysis System at  $25^\circ\text{C}$ . Electrospray ionization mass spectrometry was carried out with a Bruker Micro TOF-QII instrument. The electrochemical measurement was carried out on a CHI 660 electrochemical workstation at room temperature. The solutions were deaerated thoroughly for at least 30 min with pure nitrogen and kept under a positive pressure of this gas during the experiments. A conventional three-electrode system was employed to study the cyclic voltammetric behavior. The glass carbon electrode was used as a working electrode; Ag/AgCl as a reference electrode; Pt coil as a counter electrode, and the  $0.5 \text{ mol}\cdot\text{L}^{-1} \text{ H}_2\text{SO}_4$  (pH = 0.33) solution was used as electrolyte. Photocatalytic reactions were carried out in a Pyrex inner-irradiation-type reaction vessel with a magnetic stirrer at room temperature. The reactant solution was

evacuated using N<sub>2</sub> several times to ensure complete air removal and then irradiated by using a 500 W mercury lamp. The produced H<sub>2</sub> was analyzed by a GC9800 instrument with a thermal conductivity detector and a 5 Å molecular sieve column (2 mm × 2 m) using N<sub>2</sub> as carrier gas.

## 2. Synthesis

Synthesis of **1**: A mixture of Na<sub>2</sub>WO<sub>4</sub>·2H<sub>2</sub>O (2.0 g) and NaOAc·3H<sub>2</sub>O (8 g) in 40 mL of water was adjusted the pH to 2.6 with 2M HCl. And then Mn<sub>12</sub>-acetate (0.5 g) was added to the solution in portions. The mixture was vigorously stirred at room temperature for 60 min, then refluxed at 100 °C for another 120 min, and filtered while hot. Dimethylamine hydrochloride (2.0 g) was added to the resulting filtrate, and the clear, brown solution was left to crystallize at room temperature. Rufous crystals suitable for X-ray crystallography were obtained after approximately two month (yield 6.3 mg, 38% based on W). Elemental analysis: Anal. Calc.: H 1.36; C 3.13; N 1.82; Cl 1.54; Mn 2.39; W 67.97 %. Found: H 1.38; C 3.16; N 1.76; Cl 1.31; Mn 2.44; W 67.21 %.

## 3. Crystallographic data for **1**

Crystallographic data for **1** (H<sub>62</sub>C<sub>12</sub>N<sub>6</sub>O<sub>63</sub>Cl<sub>2</sub>Mn<sub>2</sub>W<sub>17</sub>), *Mr* = 4604.62, orthorhombic, space group *Cmc2(1)*, *a* = 17.607(5) Å, *b* = 21.831(5) Å, *c* = 22.897(5) Å,  $\alpha = \beta = \gamma = 90^\circ$ , *V* = 8801(4) Å<sup>3</sup>, *Z* = 4,  $\mu = 22.544 \text{ mm}^{-1}$ , *D<sub>c</sub>* = 3.516 g·cm<sup>-3</sup>, *F*(000) = 8208.0, *R<sub>1</sub>* = 0.0593, *wR<sub>2</sub>* = 0.1589 (*I* > 2σ(*I*)), *GOF* = 1.006, *T* = 293(2) K. A total of 7915 data were measured. The data were corrected for absorption by the multi-scan. The H atoms have not been located, but were included into the formula directly. CCDC 919424.

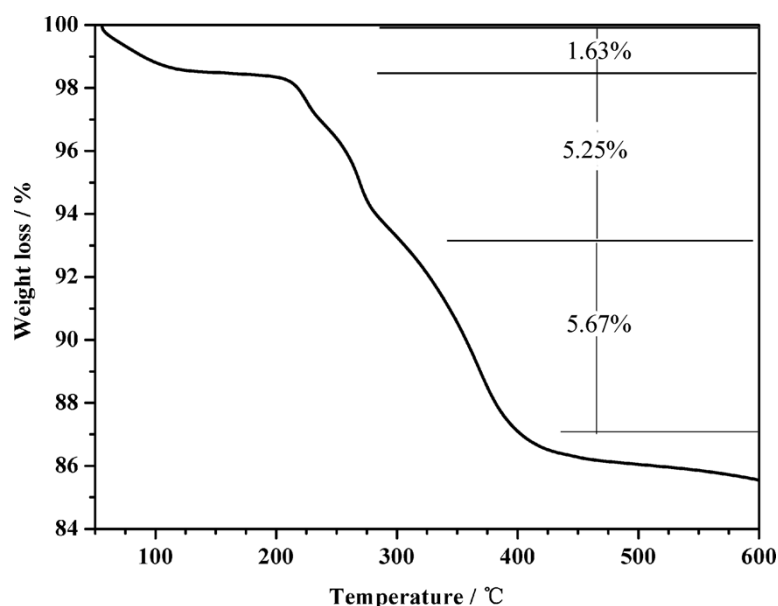

**Fig. S1** TG curve of **1** measured under  $N_2$  atmosphere with a heating rate of  $10\text{ }^\circ\text{C}\cdot\text{min}^{-1}$ .

The weight loss of 1.63% (calcd 1.56%) below  $200\text{ }^\circ\text{C}$  was attributed to the loss of four lattice water molecules. The weight loss of 5.25% (calcd 5.87%) between  $200\text{--}300\text{ }^\circ\text{C}$  was attributed to the loss of all  $\text{CH}_3\text{NHCH}_3$  organic cations, followed by the decomposition of **1a**. The observed experimental values are in approximate consistence with the theoretical values.

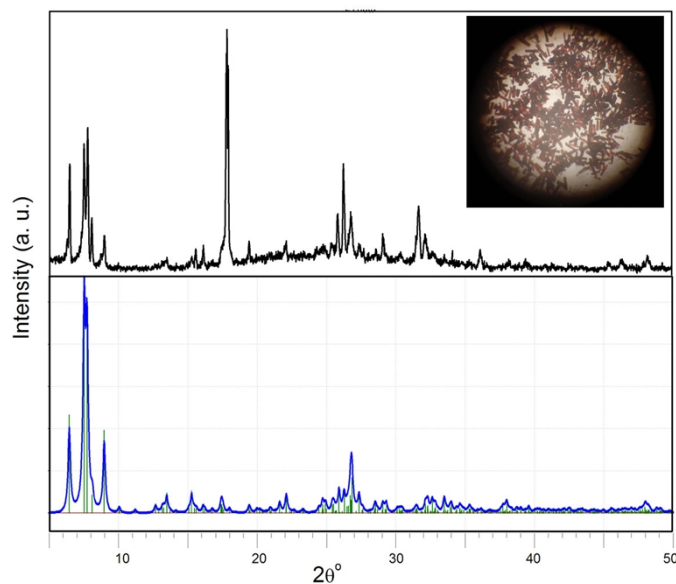

**Fig. S2** The XRD pattern of the as-synthesized (top) and simulated pattern (bottom) of **1**. Inset: The photographs of compound **1** for XRD test.

The new simulated diffraction pattern from single-crystal XRD is obtained through the program ‘Mercury’ and ‘Diamond’. The simulated/experimental XRD patterns (Fig. S2) match well in position, indicating the phase purity, which is confirmed by the photo (the inset of Fig. S2). The massive peak in the experimental data (around ca. 17.7 degrees) in two theta may be caused by the preferential orientation of (0, 2, 4) crystal plane in the measurement.

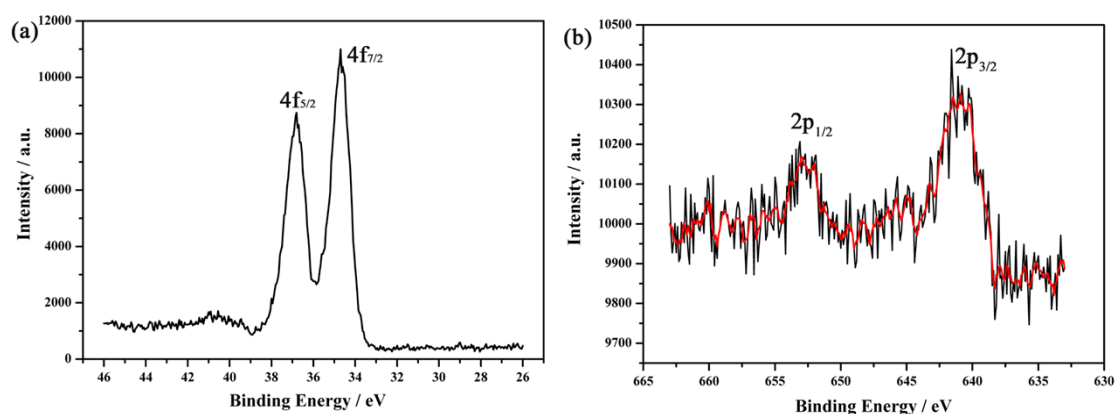

**Fig. S3** XPS spectrum of compound **1**, (a) for W and (b) for Mn.

As shown in Fig. S3a, the XPS spectrum of **1** gives two peaks at 34.6 and 37.0 eV attributed to  $W^{6+} 4f_{7/2}$  and  $W^{6+} 4f_{5/2}$ , respectively.<sup>S1, S2</sup> Fig. S3b shows two peaks at 641.5 and 653.0 eV, which can be ascribed to Mn  $2p_{1/2}$  and  $2p_{3/2}$ . The distance between the two peaks is about 11.5 eV, which is consistent with the  $Mn^{3+}$  oxidation state.<sup>S3</sup>

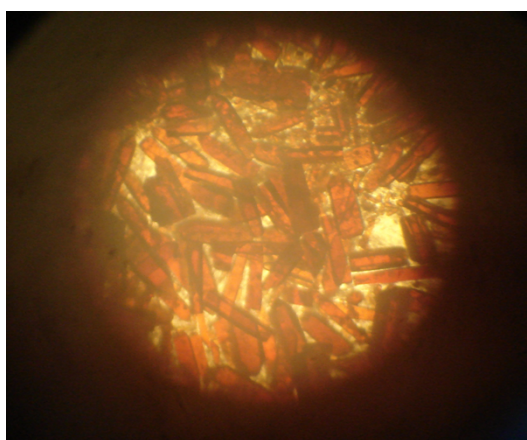

**Fig. S4** The photographs of compound **1** showing the color of the crystal.

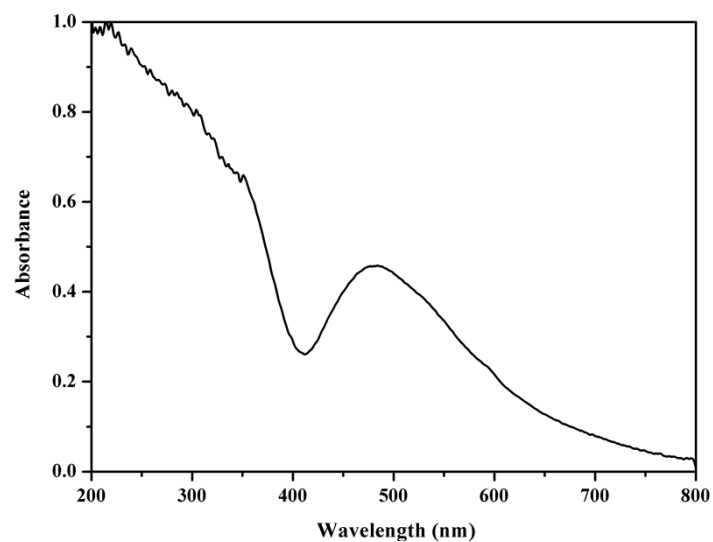

**Fig. S5:** UV-vis-NIR absorption spectrum of **1**.

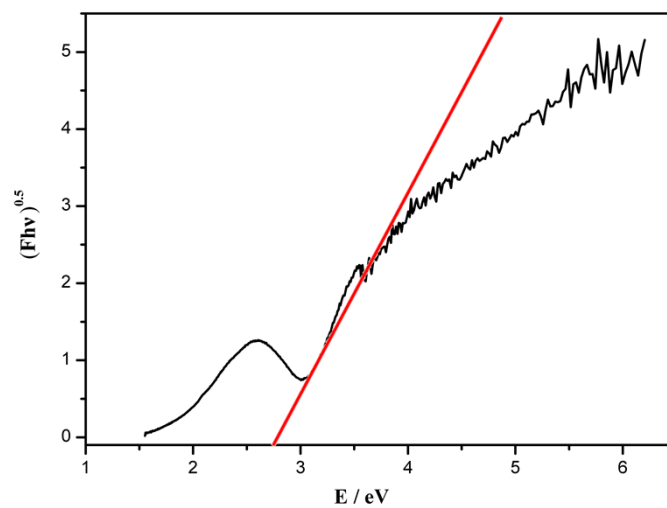

**Fig. S6** The diffuse reflectance UV-vis-NIR spectra of  $(Fh\nu)^{0.5}$  vs. energy (eV) of compound **1**.  $F = (1-R)/(1+R)$ ;  $A = \log(1/R)$ .

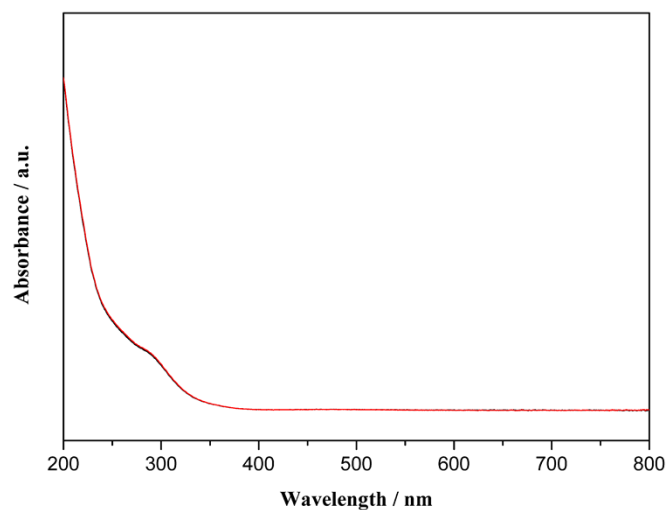

**Fig. S7** UV-Vis spectra of compound **1** before (black) and after (red) the photocatalytic reactions with 100 mg compound **1**.

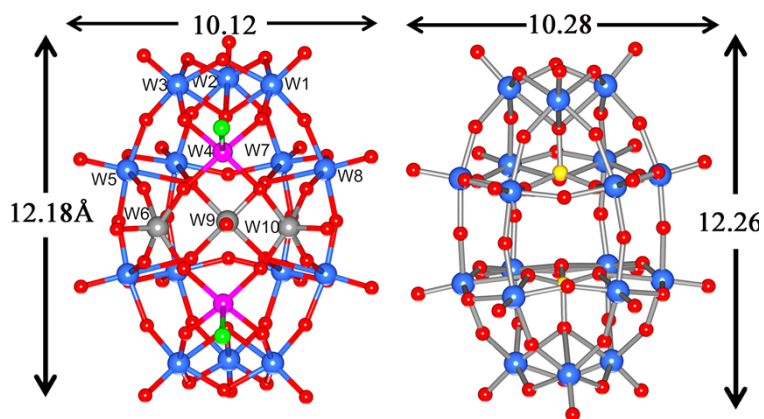

**Fig. S8** Structural representations of the {Mn<sub>2</sub>W<sub>17</sub>} (left) and {P<sub>2</sub>W<sub>18</sub>} (right) for comparison. W: gray (in the penta-coordinated environment), blue (in the hexa-coordinated environment); P: yellow; Mn: purple; Cl: green; O: red.

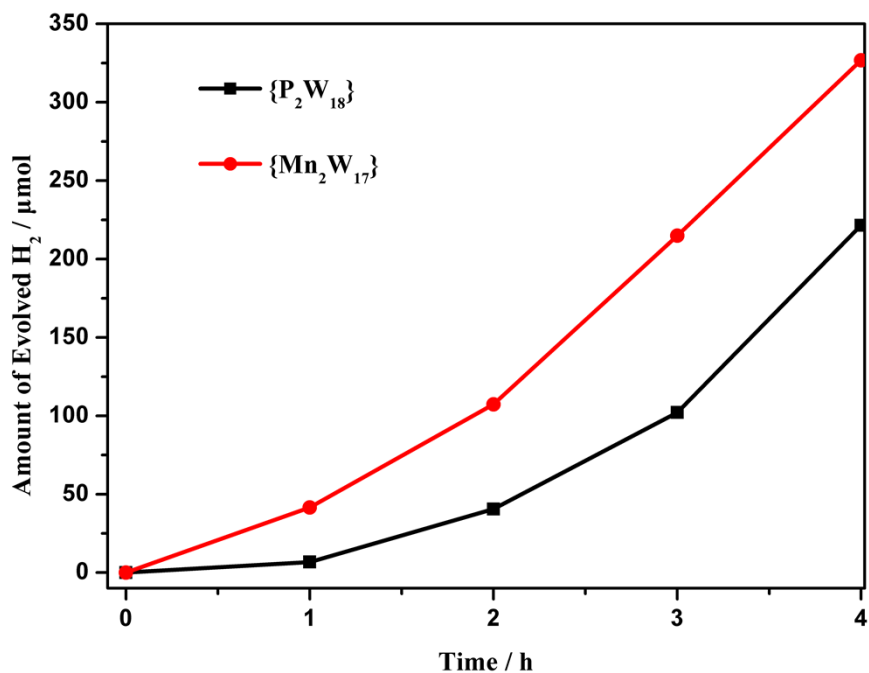

**Fig. S9** Dependence of H<sub>2</sub> production on irradiation time with the use of **1** (red) and {P<sub>2</sub>W<sub>18</sub>} (black) as photocatalysts. The experiments were performed in 100 mL of solution containing 10 mL CH<sub>3</sub>OH, 90 mL water and 0.1 g catalysts.

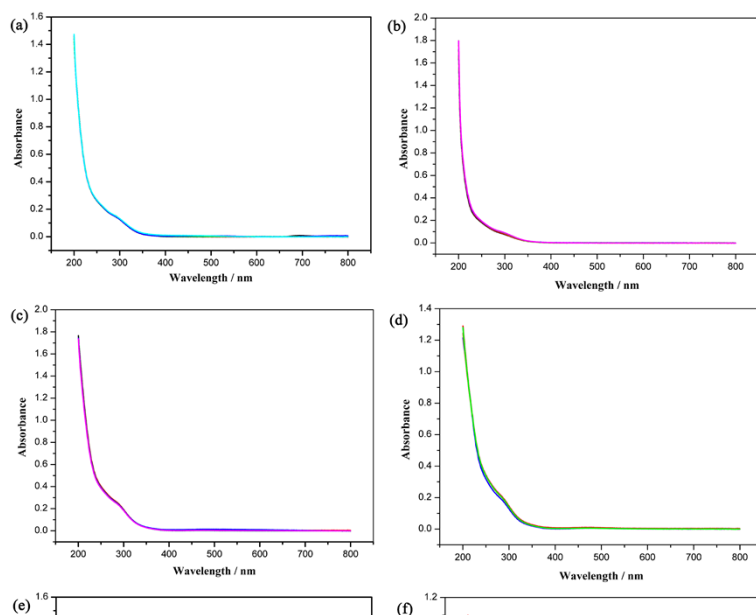

**Fig. S10** The UV spectra of **1** in a varied pH aqueous solution (0.5 M H<sub>2</sub>SO<sub>4</sub>). The UV curves were detected per 24 hours for five times. (a): pH = 0.33; (b) pH = 1; (c) pH = 2; (d) pH = 3; (e) pH = 4; (f) in water.

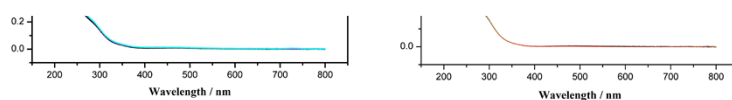



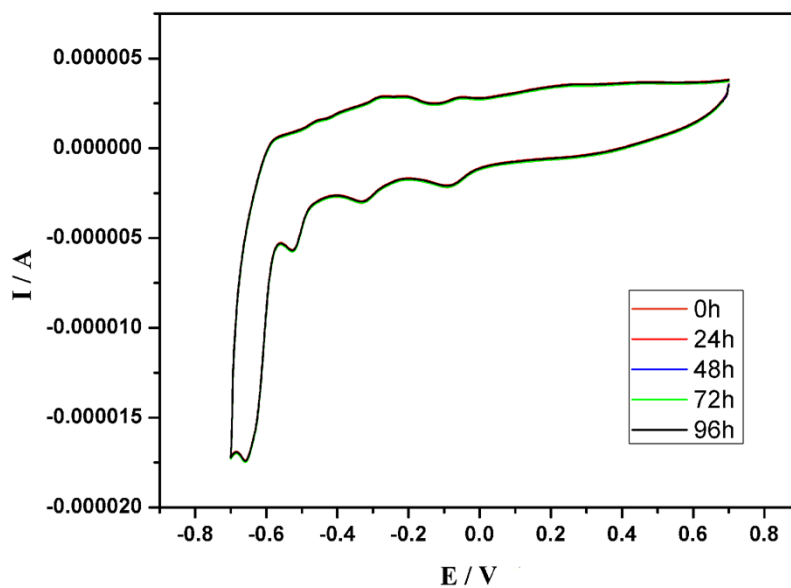

**Fig. S11** Cyclic voltammograms of **1** were detected per 24 hours for five at a scan rate of 100 mV/s. Concentration of **1** was  $4 \times 10^{-5}$  M in 25 mL of pH 0.33 (0.5 M  $\text{H}_2\text{SO}_4$ ) solution, the working electrode was glassy carbon (3 mm) and the reference electrode was Ag/AgCl.

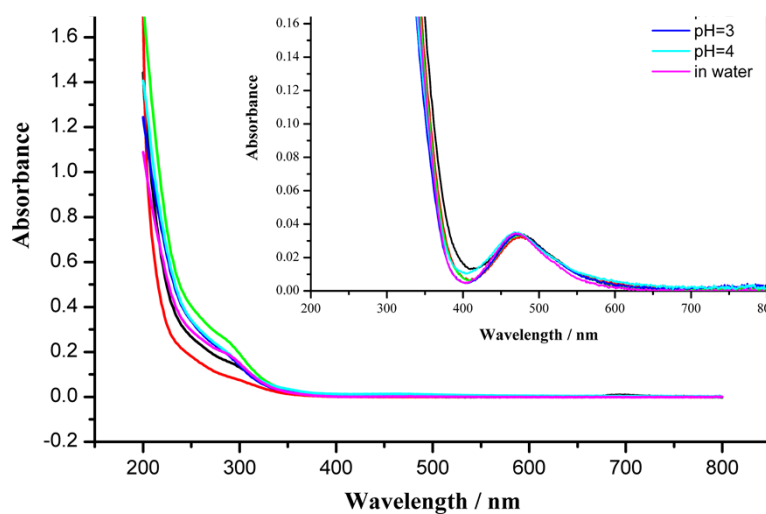

**Fig. S12** The UV spectra of **1** in varied pH aqueous solution. Inset: The UV spectra of **1** in varied pH aqueous solution at high concentration. The peaks of Mn are located at about 476 nm.

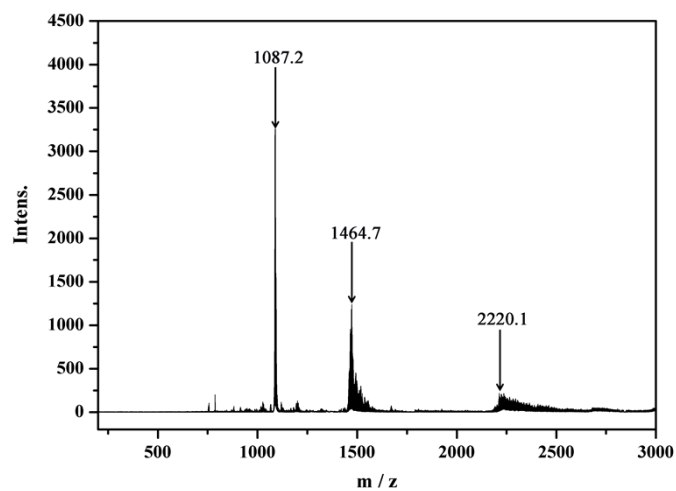

Fig. S13 ESI-MS of **1** in H<sub>2</sub>O.

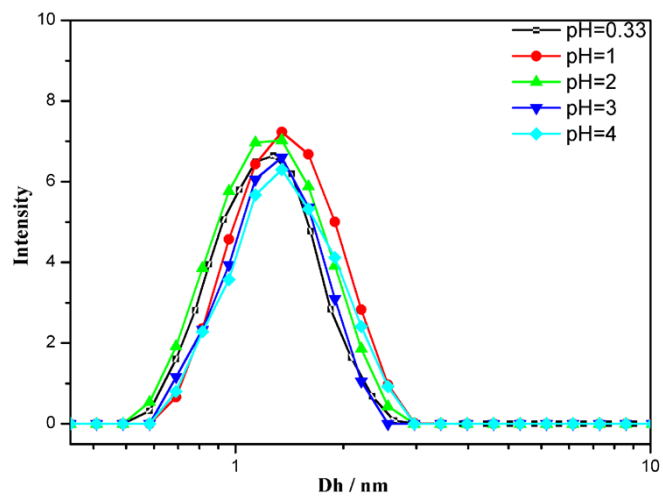

Fig. S14 DLS studies on **1** at different pH values.

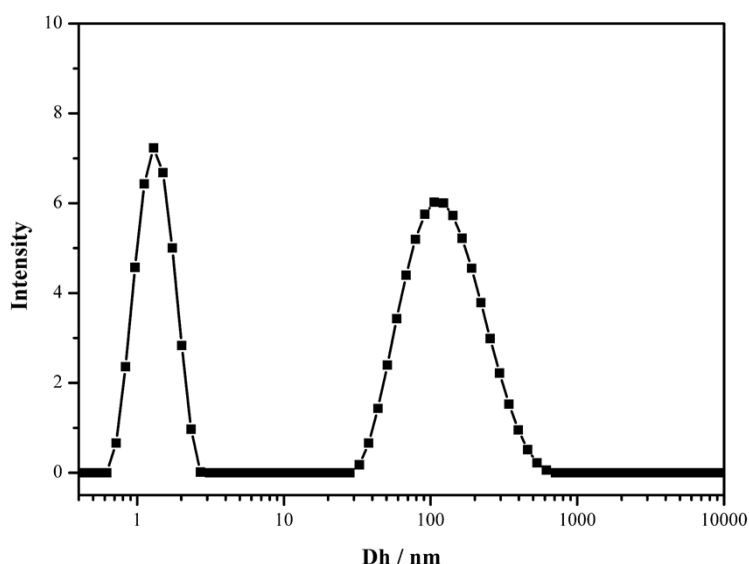

**Fig. S15** Volume size distribution of particles of cluster **1** in solutions at pH 0.33 showing the formation of higher aggregation ~106 nm.

The ESI mass spectrum of compound **1** shows that the whole cluster is completely present and all the  $m/z$  values of the main peaks can be assigned to their different charge/cation states (Fig. S13). The strongest ones are centered at  $m/z$  1087.2 and 1464.7 and have charges of  $-4$  and  $-3$ , respectively. The other peak, which has an  $m/z$  value of 2220.1 and very low intensity compared to the other two, has a charge of  $-2$ . The assignments of peaks listed in the Supporting Information (Table S4) indicate that the polyoxoanion is stable in solution. Compound **1** was studied by dynamic light scattering (DLS) in solution with different pH values at 25 °C. The hydrodynamic radius  $R_h$  was consistent with the size of **1a**, remained unchanged when the pH varied between 0.33 and 4 (Fig. S14), and this indicates that the polyoxoanion is stable in solution. DLS experiments (Fig. S15) also pointed to the possibility that higher aggregations of **1a** may form, similar to the super macroions observed by Liu<sup>S4</sup>, which is reminiscent of that reported by Cronin<sup>S5</sup>.

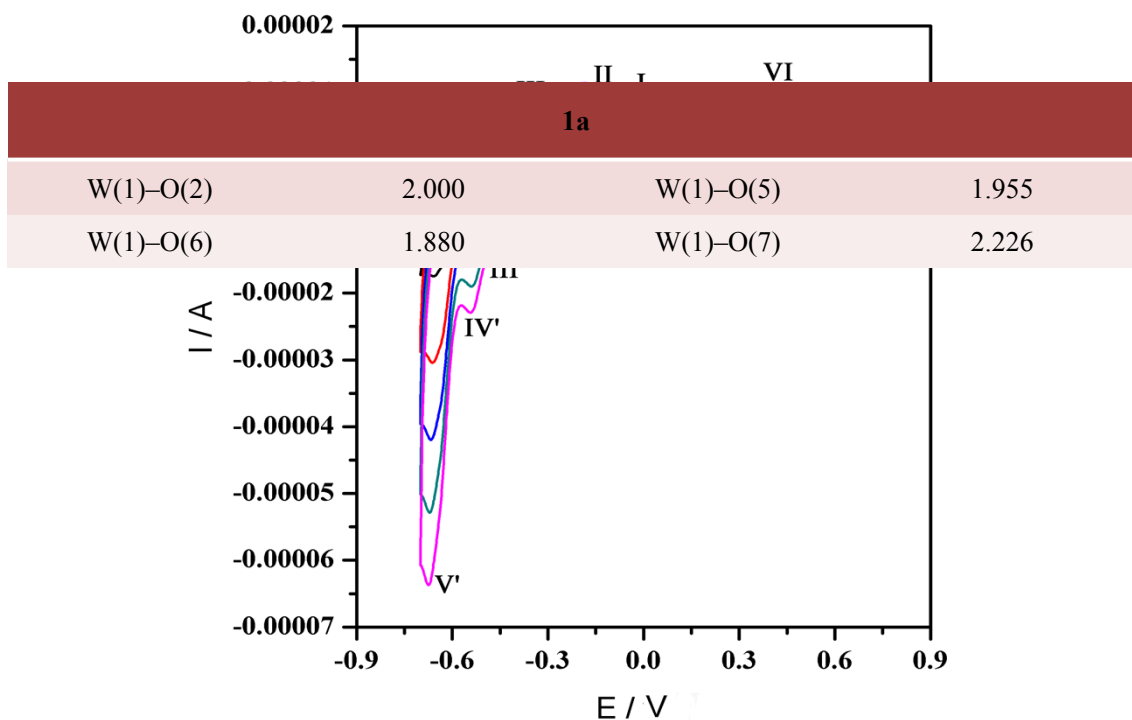

**Fig. S16** Cyclic voltammograms of **1** in the potential region of +0.7 to -0.7 V at scan rates (from inner to outer) 100, 200, 300, 400 and 500 mV/s.

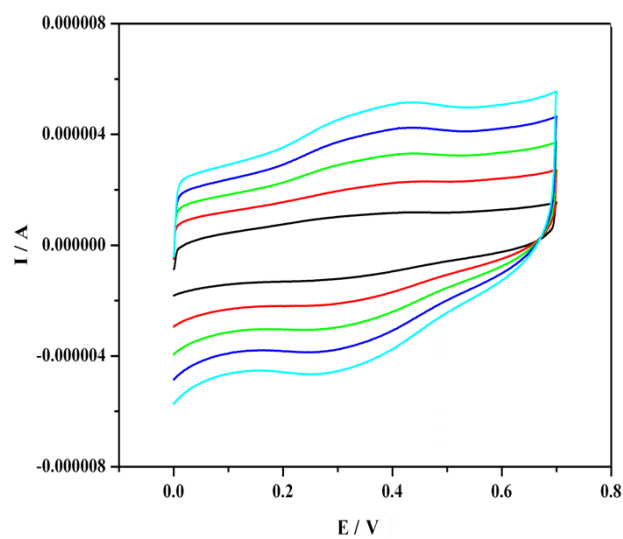

**Fig. S17** Cyclic voltammograms of **1** in the potential region of 0 to +0.7 V at scan rates (from inner to outer) 100, 200, 300, 400 and 500 mV/s.

**Table S1.** Selected bond distances ( $\text{\AA}$ ) of **1a**.

|             |       |             |       |
|-------------|-------|-------------|-------|
| W(1)–O(11)  | 1.864 | W(1)–O(13)  | 1.785 |
| W(2)–O(1)   | 1.782 | W(2)–O(2)   | 1.913 |
| W(2)–O(3)   | 1.919 | W(2)–O(7)   | 2.273 |
| W(2)–O(24)  | 1.923 | W(2)–O(31)  | 1.894 |
| W(3)–O(3)   | 1.994 | W(3)–O(5)   | 1.889 |
| W(3)–O(7)   | 2.240 | W(3)–O(8)   | 1.709 |
| W(3)–O(10)  | 1.885 | W(3)–O(12)  | 1.834 |
| W(4)–O(9)   | 2.288 | W(4)–O(20)  | 1.926 |
| W(4)–O(21)  | 1.712 | W(4)–O(22)  | 1.917 |
| W(4)–O(24)  | 1.913 | W(4)–O(33)  | 1.883 |
| W(5)–O(9)   | 2.354 | W(5)–O(10)  | 1.918 |
| W(5)–O(18)  | 1.902 | W(5)–O(19)  | 1.712 |
| W(5)–O(20)  | 1.925 | W(5)–O(23)  | 1.899 |
| W(6)–O(14)  | 1.815 | W(6)–O(17)  | 1.790 |
| W(6)–O(18)  | 1.923 | W(7)–O(4)   | 1.923 |
| W(7)–O(29)  | 2.312 | W(7)–O(30)  | 1.867 |
| W(7)–O(31)  | 1.930 | W(7)–O(32)  | 1.703 |
| W(7)–O(33)  | 1.942 | W(8)–O(6)   | 1.925 |
| W(8)–O(26)  | 1.823 | W(8)–O(27)  | 1.920 |
| W(8)–O(28)  | 1.708 | W(8)–O(29)  | 2.306 |
| W(8)–O(30)  | 1.960 | W(9)–O(9)   | 1.910 |
| W(9)–O(25)  | 1.790 | W(9)–O(29)  | 1.904 |
| W(10)–O(15) | 1.849 | W(10)–O(16) | 1.785 |
| W(10)–O(26) | 1.985 | Mn(1)–O(11) | 1.857 |
| Mn(1)–O(12) | 1.880 | Mn(1)–O(14) | 1.905 |
| Mn(1)–O(15) | 1.872 | Mn(1)–Cl(1) | 2.500 |

**Table S2.** The BVS calculation result of all the metal atoms in **1**.

| Code | Bond Valence | Code | Bond Valence |
|------|--------------|------|--------------|
| W1   | 5.823        | W7   | 6.156        |

|    |       |     |       |
|----|-------|-----|-------|
| W2 | 5.876 | W8  | 6.258 |
| W3 | 6.404 | W9  | 5.877 |
| W4 | 6.191 | W10 | 5.497 |
| W5 | 6.114 | Mn1 | 3.267 |
| W6 | 6.012 |     |       |

**Table S3.** The BVS calculation result of all the oxygen atoms in **1**.

| Oxygen Code | Bond Valence | Oxygen Code | Bond Valence | Oxygen Code | Bond Valence |
|-------------|--------------|-------------|--------------|-------------|--------------|
| O1          | 1.440        | O12         | 1.974        | O23         | 2.100        |
| O2          | 1.810        | O13         | 1.429        | O24         | 1.995        |
| O3          | 1.807        | O14         | 1.993        | O25         | 1.410        |
| O4          | 1.968        | O15         | 1.941        | O26         | 2.121        |
| O5          | 1.981        | O16         | 1.429        | O27         | 1.984        |
| O6          | 2.084        | O17         | 1.410        | O28         | 1.759        |
| O7          | 1.234        | O18         | 2.025        | O29         | 1.729        |
| O8          | 1.754        | O19         | 1.740        | O30         | 2.035        |
| O9          | 1.693        | O20         | 1.955        | O31         | 2.029        |
| O10         | 2.087        | O21         | 1.740        | O32         | 1.783        |
| O11         | 1.923        | O22         | 2.002        | O33         | 2.031        |

**Table S4.** Assignment of peaks in negative mode Mass spectrum of cluster **1**.

| Peak code | Observed m/z | Envelope Assignment                                                                                                         | Molecular mass | Calculated m/z |
|-----------|--------------|-----------------------------------------------------------------------------------------------------------------------------|----------------|----------------|
| 1         | 1087.2917    | $\{(\text{CH}_3\text{NH}_2\text{CH}_3)_2\text{H}_6[(\text{WO}_5)_3\text{W}_{14}\text{Mn}_2\text{O}_{44}\text{Cl}_2]\}^{4-}$ | 4358.2571      | 1087.0643      |
| 2         | 1464.6492    | $\{(\text{CH}_3\text{NH}_2\text{CH}_3)_3\text{H}_6[(\text{WO}_5)_3\text{W}_{14}\text{Mn}_2\text{O}_{44}\text{Cl}_2]\}^{3-}$ | 4394.3487      | 1464.7829      |
| 3         | 2220.0526    | $\{(\text{CH}_3\text{NH}_2\text{CH}_3)_4\text{H}_6[(\text{WO}_5)_3\text{W}_{14}\text{Mn}_2\text{O}_{44}\text{Cl}_2]\}^{2-}$ | 4440.4404      | 2220.2202      |

## References

- [S1] Y. Wang, L. N. Xiao, H. Ding, F. Q. Wu, L. Ye, T. G. Wang, S. Y. Shi, X. B. Cui, J. Q. Xu and D. F. Zheng, *Inorg. Chem. Commun.*, 2010, **13**, 1184.
- [S2] W. C. Chen, H. L. Li, X. L. Wang, K. Z. Shao, Z. M. Su and E. B. Wang, *Chem.–Eur. J.* 2013, **19**, 11007.
- [S3] Q. Wu, Y. G. Li, Y. H. Wang, E. B. Wang, Z. M. Zhang and R. Clérac, *Inorg. Chem.*, 2009, **48**, 1606.
- [S4] T. Liu, *J. Am. Chem. Soc.* 2003, **125**, 312.
- [S5] C. P. Pradeep, D. L. Long, C. Streb, L. Cronin, *J. Am. Chem. Soc.* 2008, **130**, 14947.
